# Supplementary material for: Diabetes Induced Alterations in Murine Vitreous Proteome Are Mitigated by IL-6 Trans-Signaling Inhibition
Source: PubMed Central journal article supplement — Invest Ophthalmol Vis Sci. 2020 Sep 1;61(11):2. doi: 10.1167/iovs.61.11.2 (PMC7476668; doi:10.1167/iovs.61.11.2), 2020-09-01
Supplement: iovs-61-11-2_s002.pdf [file iovs-61-11-2_s002.pdf]

**Supplemental Table 1. Proteomic Constituents of Healthy Murine Vitreous Humor**

| Accession | Symbol    | Description                                                | Mean PSM Count |
|-----------|-----------|------------------------------------------------------------|----------------|
| Q61597    | Crygc     | Gamma-crystallin C                                         | 1561.13        |
| P04344    | Crygb     | Gamma-crystallin B                                         | 1430.51        |
| P04342    | Crygd     | Gamma-crystallin D                                         | 797.49         |
| O35486    | Crygs     | Beta-crystallin S                                          | 613.42         |
| Q03740    | Cryge     | Gamma-crystallin E                                         | 607.54         |
| P62696    | Crybb2    | Beta-crystallin B2                                         | 583.62         |
| P07724    | Alb       | Serum albumin                                              | 359.00         |
| Q9JJV0    | Cryba4    | Beta-crystallin A4                                         | 342.11         |
| P02525    | Cryba1    | Beta-crystallin A1                                         | 262.33         |
| Q9JJU9    | Crybb3    | Beta-crystallin B3                                         | 188.71         |
| Q9JJV1    | Cryba2    | Beta-crystallin A2                                         | 182.59         |
| P04345    | Cryga     | Gamma-crystallin A                                         | 179.41         |
| P24622    | Cryaa     | Alpha-crystallin A chain                                   | 155.10         |
| P02088    | Hbb-b1    | Hemoglobin subunit beta-1                                  | 140.66         |
| Q9WVJ5    | Crybb1    | Beta-crystallin B1                                         | 131.34         |
| P70296    | Pebp1     | Phosphatidylethanolamine-binding protein 1                 | 87.74          |
| P09411    | Pgk1      | Phosphoglycerate kinase 1                                  | 63.82          |
| Q5DTX6    | Jcad      | Junctional protein associated with coronary artery disease | 57.60          |
| Q9R0P9    | Uchl1     | Ubiquitin carboxyl-terminal hydrolase isozyme L1           | 45.38          |
| P10649    | Gstm1     | Glutathione S-transferase Mu 1                             | 43.79          |
| P00920    | Ca2       | Carbonic anhydrase 2                                       | 41.42          |
| P17182    | Eno1      | Alpha-enolase                                              | 39.81          |
| P60710    | Actb      | Actin, cytoplasmic 1                                       | 37.63          |
| P17742    | Ppia      | Peptidyl-prolyl cis-trans isomerase A                      | 36.18          |
| Q9CQI6    | Cotl1     | Coactosin-like protein                                     | 34.37          |
| P17751    | Tpi1      | Triosephosphate isomerase                                  | 30.81          |
| Q05816    | Fabp5     | Fatty acid-binding protein, epidermal                      | 29.45          |
| P19157    | Gstp1     | Glutathione S-transferase P 1                              | 28.56          |
| Q99LX0    | Park7     | Protein deglycase DJ-1                                     | 26.67          |
| O08709    | Prdx6     | Peroxiredoxin-6                                            | 26.54          |
| Q921I1    | Tf        | Serotransferrin                                            | 25.48          |
| P11590    | Mup4      | Major urinary protein 4                                    | 25.35          |
| Q9CPU0    | Glo1      | Lactoylglutathione lyase                                   | 25.27          |
| O09131    | Gsto1     | Glutathione S-transferase omega-1                          | 23.60          |
| P62962    | Pfn1      | Profilin-1                                                 | 21.17          |
| Q9DBJ1    | Pgam1     | Phosphoglycerate mutase 1                                  | 17.95          |
| Q8BGZ7    | Krt75     | Keratin, type II cytoskeletal 75                           | 17.58          |
| Q61598    | Gdi2      | Rab GDP dissociation inhibitor beta                        | 17.39          |
| P31786    | Dbi       | Acyl-CoA-binding protein                                   | 17.26          |
| P16015    | Ca3       | Carbonic anhydrase 3                                       | 15.94          |
| Q9R0P5    | Dstn      | Destrin                                                    | 11.81          |
| Q04447    | Ckb       | Creatine kinase B-type                                     | 11.74          |
| Q6UGQ3    | Scgb2b2   | Secretoglobin family 2B member 2                           | 11.55          |
| P0CG49    | Ubb       | Polyubiquitin-B                                            | 11.24          |
| P99029    | Prdx5     | Peroxiredoxin-5, mitochondrial                             | 11.05          |
| P27005    | S100a8    | Protein S100-A8                                            | 10.58          |
| Q6XVG2    | Cyp2c54   | Cytochrome P450 2C54                                       | 10.23          |
| P01942    | Hba       | Hemoglobin subunit alpha                                   | 10.00          |
| P62774    | Mtpn      | Myotrophin                                                 | 9.62           |
| O09114    | Ptgds     | Prostaglandin-H2 D-isomerase                               | 9.14           |
| P07759    | Serpina3k | Serine protease inhibitor A3K                              | 8.34           |
| Q8VDG3    | Parn      | Poly(A)-specific ribonuclease PARN                         | 8.26           |
| P23927    | Cryab     | Alpha-crystallin B chain                                   | 7.94           |
| Q9EPR4    | Slc23a2   | Solute carrier family 23 member 2                          | 7.52           |
| P14152    | Mdh1      | Malate dehydrogenase, cytoplasmic                          | 7.48           |
| P62204    | Calm1     | Calmodulin                                                 | 6.76           |
| P68037    | Ube2l3    | Ubiquitin-conjugating enzyme E2 L3                         | 6.65           |
| P16858    | Gapdh     | Glyceraldehyde-3-phosphate dehydrogenase                   | 6.56           |
| Q00896    | Serpina1c | Alpha-1-antitrypsin 1-3                                    | 6.37           |

|               |           |                                                         |      |
|---------------|-----------|---------------------------------------------------------|------|
| <b>P04938</b> | Mup8      | Major urinary proteins 11 and 8 (Fragment)              | 6.16 |
| <b>E9PZQ0</b> | Ryr1      | Ryanodine receptor 1                                    | 5.68 |
| <b>Q2VPA6</b> | Helq      | Helicase POLQ-like                                      | 5.29 |
| <b>P18760</b> | Cfl1      | Cofilin-1                                               | 4.51 |
| <b>P62827</b> | Ran       | GTP-binding nuclear protein Ran                         | 4.23 |
| <b>Q8VED5</b> | Krt79     | Keratin, type II cytoskeletal 79                        | 4.12 |
| <b>Q8BLN6</b> | Unc80     | Protein unc-80 homolog                                  | 4.07 |
| <b>Q9CR86</b> | Carhsp1   | Calcium-regulated heat stable protein 1                 | 4.04 |
| <b>P63101</b> | Ywhaz     | 14-3-3 protein zeta/delta                               | 3.88 |
| <b>Q91X72</b> | Hpx       | Hemopexin                                               | 3.78 |
| <b>P70349</b> | Hint1     | Histidine triad nucleotide-binding protein 1            | 3.76 |
| <b>Q62048</b> | Pea15     | Astrocytic phosphoprotein PEA-15                        | 3.69 |
| <b>O35639</b> | Anxa3     | Annexin A3                                              | 3.68 |
| <b>P40142</b> | Tkt       | Transketolase                                           | 3.15 |
| <b>Q8BFZ3</b> | Actbl2    | Beta-actin-like protein 2                               | 3.09 |
| <b>P06151</b> | Ldha      | L-lactate dehydrogenase A chain                         | 3.04 |
| <b>Q8VDD9</b> | Phip      | PH-interacting protein                                  | 2.71 |
| <b>Q9Z329</b> | Itpr2     | Inositol 1,4,5-trisphosphate receptor type 2            | 2.67 |
| <b>Q925F2</b> | Esam      | Endothelial cell-selective adhesion molecule            | 2.61 |
| <b>P98195</b> | Atp9b     | Probable phospholipid-transporting ATPase IIB           | 2.51 |
| <b>Q4ACU6</b> | Shank3    | SH3 and multiple ankyrin repeat domains protein 3       | 2.49 |
| <b>P20443</b> | Sag       | S-arrestin                                              | 2.48 |
| <b>Q7TNC6</b> | Kif26b    | Kinesin-like protein KIF26B                             | 2.42 |
| <b>P10107</b> | Anxa1     | Annexin A1                                              | 2.41 |
| <b>Q66X22</b> | Nlrp9b    | NACHT, LRR and PYD domains-containing protein 9B        | 2.40 |
| <b>Q68G58</b> | Apex2     | DNA-(apurinic or apyrimidinic site) lyase 2             | 2.33 |
| <b>P31725</b> | S100a9    | Protein S100-A9                                         | 2.29 |
| <b>P56376</b> | Acyp1     | Acylphosphatase-1                                       | 2.22 |
| <b>Q3V1L6</b> | Mtmt11    | Myotubularin-related protein 11                         | 2.22 |
| <b>Q9ERS4</b> | Plekha3   | Pleckstrin homology domain-containing family A member 3 | 2.22 |
| <b>P97477</b> | Aurka     | Aurora kinase A                                         | 2.22 |
| <b>P48758</b> | Cbr1      | Carbonyl reductase [NADPH] 1                            | 2.18 |
| <b>P35922</b> | Fmr1      | Fragile X mental retardation protein 1 homolog          | 2.18 |
| <b>O35215</b> | Ddt       | D-dopachrome decarboxylase                              | 2.14 |
| <b>P45376</b> | Akr1b1    | Aldose reductase                                        | 2.14 |
| <b>P42682</b> | Txk       | Tyrosine-protein kinase TXK                             | 2.12 |
| <b>P47739</b> | Aldh3a1   | Aldehyde dehydrogenase, dimeric NADP-preferring         | 2.10 |
| <b>Q9CPV4</b> | Glod4     | Glyoxalase domain-containing protein 4                  | 2.09 |
| <b>P49194</b> | Rbp3      | Retinol-binding protein 3                               | 2.01 |
| <b>A2ASS6</b> | Ttn       | Titin                                                   | 2.00 |
| <b>Q8K440</b> | Abca8b    | ATP-binding cassette sub-family A member 8-B            | 2.00 |
| <b>Q00897</b> | Serpina1d | Alpha-1-antitrypsin 1-4                                 | 1.99 |
| <b>Q03734</b> | Serpina3m | Serine protease inhibitor A3M                           | 1.99 |
| <b>Q9QY00</b> | Olf154    | Olfactory receptor 154                                  | 1.98 |
| <b>P48036</b> | Anxa5     | Annexin A5                                              | 1.91 |
| <b>Q9Z275</b> | Rlbp1     | Retinaldehyde-binding protein 1                         | 1.86 |
| <b>Q8BGY2</b> | Eif5a2    | Eukaryotic translation initiation factor 5A-2           | 1.86 |
| <b>Q06194</b> | F8        | Coagulation factor VIII                                 | 1.85 |
| <b>Q9JI02</b> | Scgb2b20  | Secretoglobin family 2B member 20                       | 1.82 |
| <b>Q8VHL5</b> | Crygn     | Gamma-crystallin N                                      | 1.82 |
| <b>P10126</b> | Eef1a1    | Elongation factor 1-alpha 1                             | 1.81 |
| <b>P05064</b> | Aldoa     | Fructose-bisphosphate aldolase A                        | 1.79 |
| <b>P13634</b> | Ca1       | Carbonic anhydrase 1                                    | 1.78 |
| <b>Q923Q2</b> | Stard13   | StAR-related lipid transfer protein 13                  | 1.76 |
| <b>Q7TSH8</b> | Kiaa0195  | Uncharacterized protein KIAA0195                        | 1.76 |
| <b>Q6T264</b> | Maml1     | Mastermind-like protein 1                               | 1.70 |
| <b>Q9DB32</b> | Haghl     | Hydroxyacylglutathione hydrolase-like protein           | 1.70 |
| <b>Q9R0P3</b> | Esd       | S-formylglutathione hydrolase                           | 1.70 |
| <b>Q62130</b> | Ptpn14    | Tyrosine-protein phosphatase non-receptor type 14       | 1.70 |
| <b>Q9WV27</b> | Atp1a4    | Sodium/potassium-transporting ATPase subunit alpha-4    | 1.70 |
| <b>P63268</b> | Actg2     | Actin, gamma-enteric smooth muscle                      | 1.66 |
| <b>P97493</b> | Txn2      | Thioredoxin, mitochondrial                              | 1.65 |
| <b>Q91X56</b> | S1pr5     | Sphingosine 1-phosphate receptor 5                      | 1.65 |
| <b>Q8R4R6</b> | Nup35     | Nucleoporin NUP53                                       | 1.6  |

|               |          |                                                   |      |
|---------------|----------|---------------------------------------------------|------|
| <b>P19137</b> | Lama1    | Laminin subunit alpha-1                           | 1.62 |
| <b>Q9JLB4</b> | Cubn     | Cubilin                                           | 1.62 |
| <b>Q3UV71</b> | Tmtc1    | Transmembrane and TPR repeat-containing protein 1 | 1.62 |
| <b>Q5F2L2</b> | Fut10    | Alpha-(1,3)-fucosyltransferase 10                 | 1.62 |
| <b>Q91W20</b> | Lrrc26   | Leucine-rich repeat-containing protein 26         | 1.62 |
| <b>E9Q6I0</b> | Vmn2r116 | Vomeronasal type-2 receptor 116                   | 1.59 |
| <b>P24472</b> | Gsta4    | Glutathione S-transferase A4                      | 1.59 |
| <b>Q01776</b> | Gnrhr    | Gonadotropin-releasing hormone receptor           | 1.59 |
| <b>Q923X1</b> | Adgrl4   | Adhesion G protein-coupled receptor L4            | 1.59 |
| <b>Q8VHE0</b> | Sec63    | Translocation protein SEC63 homolog               | 1.59 |
| <b>Q9D1U0</b> | Grifin   | Grifin                                            | 1.55 |
| <b>P52480</b> | Pkm      | Pyruvate kinase PKM                               | 1.55 |
| <b>Q8C1Y8</b> | Ccz1     | Vacuolar fusion protein CCZ1 homolog              | 1.51 |
| <b>P35492</b> | Hal      | Histidine ammonia-lyase                           | 1.51 |
| <b>O88737</b> | Bsn      | Protein bassoon                                   | 1.51 |
| <b>Q00175</b> | Pgr      | Progesterone receptor                             | 1.51 |
| <b>Q9QW08</b> | Pdc      | Phosducin                                         | 1.47 |
| <b>Q61097</b> | Ksr1     | Kinase suppressor of Ras 1                        | 1.44 |
| <b>Q8R516</b> | Mib2     | E3 ubiquitin-protein ligase MIB2                  | 1.44 |
| <b>Q9Z0R4</b> | Itsn1    | Intersectin-1                                     | 1.44 |
| <b>P05063</b> | Aldoc    | Fructose-bisphosphate aldolase C                  | 1.41 |
| <b>Q61391</b> | Mme      | Nepriylsin                                        | 1.41 |
| <b>Q7TMY8</b> | Huwe1    | E3 ubiquitin-protein ligase HUWE1                 | 1.41 |
| <b>Q91XT6</b> | Tc2n     | Tandem C2 domains nuclear protein                 | 1.41 |
| <b>Q9EPN1</b> | Nbea     | Neurobeachin                                      | 1.41 |
| <b>Q9QXE7</b> | Tbl1x    | F-box-like/WD repeat-containing protein TBL1X     | 1.41 |
| <b>P47880</b> | Igfbp6   | Insulin-like growth factor-binding protein 6      | 1.41 |
| <b>Q9JIB4</b> | Gtf2h2   | General transcription factor IIH subunit 2        | 1.41 |
| <b>P23949</b> | Zfp36l2  | Zinc finger protein 36, C3H1 type-like 2          | 1.41 |
| <b>Q9D287</b> | Bcas2    | Pre-mRNA-splicing factor SPF27                    | 1.41 |
| <b>F6TQD1</b> | Rnf212   | Probable E3 SUMO-protein ligase RNF212            | 1.41 |
